# Supplementary material for: The Origin and Invasion Pathway of Brown Rats Rattus norvegicus on Dok-Do Island Revealed by Genome-Wide Markers from 3-RADseq Approach
Source: MDPI journal article supplement (doi:10.3390/ani13071243), 2023-04-03
Supplement: s1 [file s1]

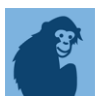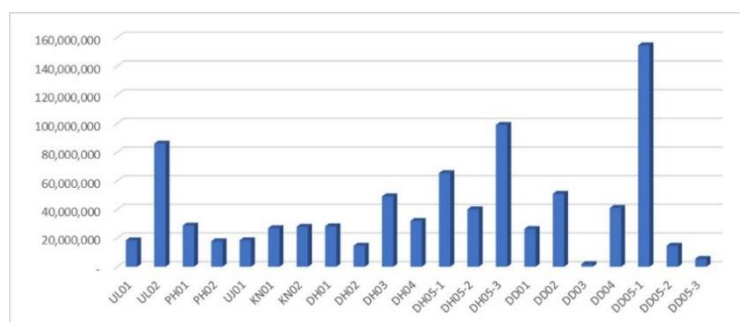

**Supplementary Figure S1.** Histogram of DNA reads number of 17 *Rattus norvegicus* from four ports along the east coast of Korea, Ulleung-do, and Dok-do.

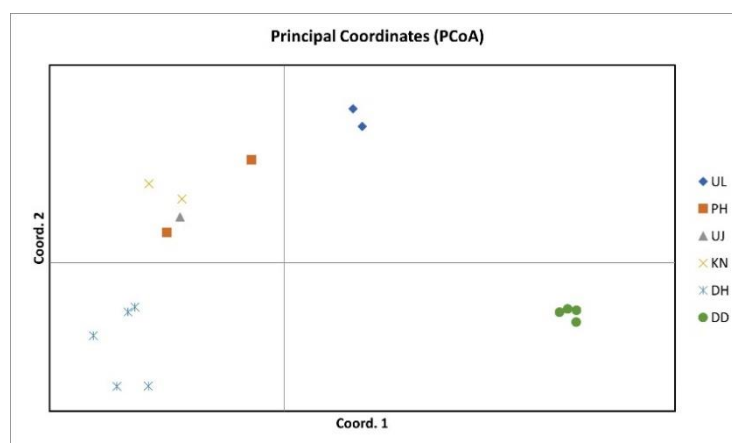

**Supplementary Figure S2.** Principal component analysis (PCoA) plot for 16 *Rattus norvegicus* from four ports along the east coast of Korea, Ulleung-do, and Dok-do. PC1 and PC2 were plotted.

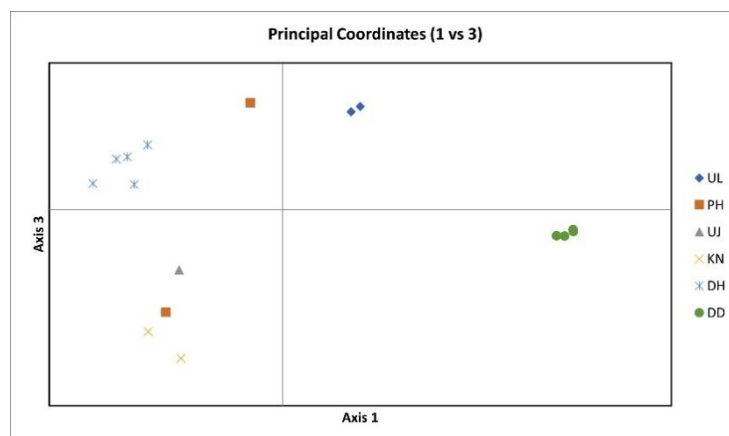

**Supplementary Figure S3.** Principal component analysis (PCoA) plot for 16 *Rattus norvegicus* from four ports along the east coast of Korea, Ulleung-do, and Dok-do. PC1 and PC3 were plotted. .

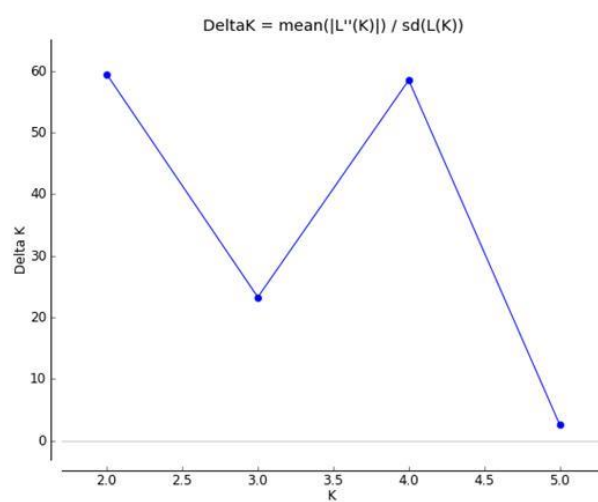

**Supplementary Figure S4.** Delta K ( $\Delta K$ ) graph obtained by Structure Harvester.
